# Supplementary material for: Early Evaluation of an Ultra-Portable X-ray System for Tuberculosis Active Case Finding
Source: MDPI journal article supplement (doi:10.3390/tropicalmed6030163), 2021-09-04
Supplement: s1 [file s1]

## SUPPLEMENTAL INFORMATION

### Supplemental methods

**Table S1.** Testing parameters of the radiologic inspection of the x-ray generator by the Institute for Nuclear Science and Technology (INST).

| Item | Testing parameter                                                            |
|------|------------------------------------------------------------------------------|
| 1    | High voltage waveform                                                        |
| 2    | Molding and appearance                                                       |
| 3    | Switches, buttons                                                            |
| 4    | Mechanical functionality, cassette tray, tube holder, tube crank, collimator |
|      | Distance indicator from tube focal spot to image receptor                    |
| 5    | Exposure alarm signal                                                        |
|      | Remote exposure controller                                                   |
| 6    | Peak kilovoltage accuracy                                                    |
| 7    | Peak kilovoltage reproducibility                                             |
| 8    | Exposure time accuracy                                                       |
| 9    | Output dose reproducibility                                                  |
| 10   | Output dose linearity                                                        |
| 11   | Effective focal spot size                                                    |
| 12   | Perpendicularity of x-ray beam                                               |
| 13   | x-ray to light field alignment                                               |
| 14   | Primary beam filter (Half-value layer assessment)                            |

## Supplemental results

**Table S2.** Comparison of adjusted <sup>1</sup> image quality by a human reader between the reference and ultra-portable X-ray systems at the National Lung Hospital.

|                | Reference X-ray system |      |              | Ultra-portable X-ray system |      |              | p-value <sup>3</sup> |
|----------------|------------------------|------|--------------|-----------------------------|------|--------------|----------------------|
|                | N <sup>2</sup>         | Mean | 95% CI       | N                           | Mean | 95% CI       |                      |
| Radiologist #1 | 134                    | 4.02 | [3.98, 4.06] | 134                         | 3.65 | [3.55, 3.74] | <0.001               |
| Radiologist #2 | 134                    | 3.99 | [3.95, 4.02] | 134                         | 3.82 | [3.76, 3.89] | <0.001               |
| Radiologist #3 | 134                    | 4.01 | [3.99, 4.04] | 134                         | 3.70 | [3.62, 3.79] | <0.001 <sup>4</sup>  |
| Overall        | 402                    | 4.01 | [3.99, 4.03] | 402                         | 3.73 | [3.68, 3.77] | <0.001               |

<sup>1</sup> The adjusted VGA included images that were deemed comparable by AI on properties including rotation, inspiration, position and exposure/penetration using thresholds of 0.35, 0.8, 0.8-0.95 and 0.5-0.9, respectively, on a possible scoring range of 0 to 1; <sup>2</sup> 26 image pairs were found to have suboptimal image properties and were excluded from the adjusted VGA; <sup>3</sup> Wald test from ordinal logistic regression for individual radiologists and mixed-effect ordinal logistic regression for the overall p-value adjusting for clinical and diagnostic covariates with robust standard error estimates; <sup>4</sup> Wald test from ordinal logistic regression for individual radiologists with the covariate of night sweats omitted due to collinearity and unstable results of the saturated model.

**Table S3.** Sample characteristics of participants in the community screening event.

|                                 | Reference X-ray system  | Ultra-portable X-ray system | Total sample            | p-value <sup>1</sup> |
|---------------------------------|-------------------------|-----------------------------|-------------------------|----------------------|
| Total participants <sup>2</sup> | 3,604                   | 790                         | 4,394                   |                      |
| Age [median, IQR]               | 38 (27–52)<br>(N=3,597) | 43 (29–56)<br>(N=789)       | 39 (27–53)<br>(N=4,389) | <0.001               |
| Sex [N, %]                      |                         |                             |                         |                      |
| Male                            | 1,655 (45.9%)           | 436 (55.2%)                 | 2,091 (47.6%)           | <0.001               |
| Female                          | 1,949 (54.1%)           | 354 (44.8%)                 | 2,303 (52.4%)           |                      |
| TB patient contact [N, %]       |                         |                             |                         |                      |
| No                              | 3,368 (93.5%)           | 763 (96.6%)                 | 4,131 (94.0%)           | <0.001               |
| Yes                             | 236 (6.5%)              | 27 (3.4%)                   | 263 (6.0%)              |                      |
| SHI coverage [N, %]             |                         |                             |                         |                      |
| No                              | 38/3,530 (1.1%)         | 7/781 (0.9%)                | 45/4,311 (1.0%)         | 0.654                |
| Yes                             | 3,492/3,530 (98.9%)     | 783/781 (99.1%)             | 4,266/4,311 (99.0%)     |                      |
| Cough [N, %]                    |                         |                             |                         |                      |
| No                              | 2,915 (80.9%)           | 623 (78.9%)                 | 3,538 (80.5%)           | 0.194                |
| Yes                             | 689 (19.1%)             | 167 (21.1%)                 | 856 (19.6%)             |                      |
| Fever [N, %]                    |                         |                             |                         |                      |
| No                              | 3,575 (99.2%)           | 789 (99.9%)                 | 4,364 (99.3%)           | 0.036                |
| Yes                             | 39 (0.8%)               | 1 (0.1%)                    | 30 (0.7%)               |                      |
| Weight loss [N, %]              |                         |                             |                         |                      |
| No                              | 3,547 (98.4%)           | 766 (97.0%)                 | 4,313 (98.2%)           | 0.006                |
| Yes                             | 57 (1.6%)               | 24 (3.0%)                   | 81 (1.8%)               |                      |
| Night sweats [N, %]             |                         |                             |                         |                      |
| No                              | 3,581 (99.4%)           | 784 (99.2%)                 | 4,365 (99.3%)           | 0.703                |
| Yes                             | 23 (0.6%)               | 6 (0.8%)                    | 29 (0.7%)               |                      |
| Dyspnea [N, %]                  |                         |                             |                         |                      |
| No                              | 3,325 (92.3%)           | 778 (98.5%)                 | 4,103 (93.4%)           | <0.001               |
| Yes                             | 279 (7.7%)              | 12 (1.5%)                   | 291 (6.6%)              |                      |
| Chest pain [N, %]               |                         |                             |                         |                      |

|                      |                     |                 |                     |        |
|----------------------|---------------------|-----------------|---------------------|--------|
| No                   | 3,212 (89.1%)       | 765 (96.8%)     | 3,977 (90.5%)       | <0.001 |
| Yes                  | 392 (10.9%)         | 25 (3.2%)       | 417 (9.5%)          |        |
| Appetite loss [N, %] |                     |                 |                     |        |
| No                   | 3,516 (97.6%)       | 757 (95.8%)     | 4,273 (97.3%)       | 0.007  |
| Yes                  | 88 (2.4%)           | 33 (4.2%)       | 121 (2.7%)          |        |
| Fatigue [N, %]       |                     |                 |                     |        |
| No                   | 3,268 (90.7%)       | 733 (92.8%)     | 4,001 (91.1%)       | 0.060  |
| Yes                  | 336 (9.3%)          | 57 (7.2%)       | 393 (8.9%)          |        |
| History of TB [N, %] |                     |                 |                     |        |
| No                   | 3,492/3,588 (97.3%) | 774/786 (98.5%) | 4,266/4,374 (97.5%) | 0.060  |
| Yes                  | 96/3,588 (2.7%)     | 12/786 (1.5%)   | 108/4,374 (2.5%)    |        |
| BCG vaccination      |                     |                 |                     |        |
| No                   | 2,439/3,255 (74.9%) | 585/785 (74.5%) | 3,024 (74.9%)       | 0.813  |
| Yes                  | 816/3,255 (25.1%)   | 200/785 (25.5%) | 1,016 (25.1%)       |        |

<sup>1</sup> Chi-squared test for proportions and Wilcoxon rank-sum test for medians;

<sup>2</sup> Actual N size presented in the event of missing data.
